# Supplementary material
Source: publisher figshare collection journal article supplement (https://tandf.figshare.com/ndownloader/files/21749406)
Supplement: Supplementary file 1 [file 21749406]

## Sheet: Comparison of optimization methods
Method	N	Mean OF	Median OF	Mean eps	Median eps
semopy/MLW	133	9.4562	8.9780	0.1535	0.1516
semopy/L-BFGS-B	735	9.4562	8.9780	0.1729	0.1660
semopy/SMSNO	734	9.4562	8.9780	0.1736	0.1650
semopy/SUMSL	152	9.4562	8.9780	0.1546	0.1516
semopy/HUSML	145	9.4562	8.9780	0.1546	0.1516
semopy/Adam	342	9.4562	8.9780	0.1779	0.1775

## Sheet: Comparison w.r.t. scale - Set 1
Pkg/OF	N	Mean OF	Median OF	Mean eps	Median eps	Time (s)
semopy/MLW	266	2.7260	2.7767	0.1533	0.1496	62
lavaan/MLW	282	2.7260	2.7767	0.1534	0.1490	537
semopy/ULS	366	3.8450	3.7075	0.1663	0.1602	44
lavaan/ULS	367	3.8450	3.7075	0.1661	0.1597	389
semopy/GLS	265	1.7896	1.7695	0.1558	0.1491	39
lavaan/GLS	287	1.7896	1.7695	0.1560	0.1483	735

## Sheet: Comparison w.r.t. scale - Set 2
Pkg/OF	N	Mean OF	Median OF	Mean eps	Median eps	Time (s)
semopy/MLW	123	2.6028	2.5345	0.1257	0.1135	43
lavaan/MLW	135	2.6028	2.5345	0.1260	0.1135	335
semopy/ULS	188	6.6059	5.3978	0.1416	0.1299	33
lavaan/ULS	190	6.6059	5.3978	0.1413	0.1293	283
semopy/GLS	139	1.7607	1.6554	0.1257	0.1118	41
lavaan/GLS	158	1.7607	1.6554	0.1263	0.1117	547

## Sheet: Comparison w.r.t. scale - Set 3
Pkg/OF	N	Mean OF	Median OF	Mean eps	Median eps	Time (s)
semopy/MLW	41	2.7072	2.4699	0.1053	0.0926	39
lavaan/MLW	45	2.7072	2.4699	0.1052	0.0926	251
semopy/ULS	76	14.0281	9.7940	0.1208	0.1105	31
lavaan/ULS	81	14.0281	9.7940	0.1206	0.1113	205
semopy/GLS	54	2.2953	1.8103	0.1084	0.0940	40
lavaan/GLS	77	2.2953	1.8103	0.1077	0.0934	594

## Sheet: Comparison w.r.t. scale - Set 4
Pkg/OF	N	Mean OF	Median OF	Mean eps	Median eps	Time (s)
semopy/MLW	13	3.4445	3.1029	0.0864	0.0690	41
lavaan/MLW	13	3.4445	3.1029	0.0865	0.0690	208
semopy/ULS	41	151.1858	50.6358	0.1070	0.0907	37
lavaan/ULS	44	151.1858	50.6358	0.1075	0.0909	246
semopy/GLS	42	11.1607	4.3359	0.0944	0.0703	39
lavaan/GLS	56	11.1607	4.3359	0.0923	0.0694	347

## Sheet: Comparison w.r.t. scale - Set 5
Pkg/OF	N	Mean OF	Median OF	Mean eps	Median eps	Time (s)
semopy/MLW	4	5.1923	4.1095	0.0772	0.0589	53
lavaan/MLW	5	5.1923	4.1095	0.0772	0.0590	189
semopy/ULS	65	4068.9163	280.4789	0.0985	0.0803	50
lavaan/ULS	77	4068.9163	280.4789	0.0995	0.0794	413
semopy/GLS	80	103.9181	15.2646	0.0854	0.0589	42
lavaan/GLS	90	103.9181	15.2646	0.0843	0.0581	449

## Sheet: Comparison w.r.t. scale - Set 6
Pkg/OF	N	Mean OF	Median OF	Mean eps	Median eps	Time (s)
semopy/MLW	33	1.3809	0.7493	0.1106	0.0985	37
lavaan/MLW	33	1.3809	0.7493	0.1106	0.0985	191
semopy/ULS	68	7.3389	1.2061	0.1280	0.1234	27
lavaan/ULS	67	7.3389	1.2061	0.1260	0.1201	139
semopy/GLS	44	3.8728	1.5436	0.1160	0.1045	42
lavaan/GLS	48	3.8728	1.5436	0.1140	0.1022	161

## Sheet: Comparison w.r.t. scale - Set 7
Pkg/OF	N	Mean OF	Median OF	Mean eps	Median eps	Time (s)
semopy/MLW	39	2.3810	1.9227	0.1178	0.1055	52
lavaan/MLW	45	2.3810	1.9227	0.1178	0.1055	318
semopy/ULS	78	12.2871	5.7176	0.1365	0.1286	38
lavaan/ULS	77	12.2871	5.7176	0.1352	0.1281	255
semopy/GLS	61	3.8458	2.3088	0.1250	0.1123	46
lavaan/GLS	74	3.8458	2.3088	0.1232	0.1109	675

## Sheet: Comparison w.r.t. scale - Set 8
Pkg/OF	N	Mean OF	Median OF	Mean eps	Median eps	Time (s)
semopy/MLW	43	3.6149	3.2215	0.1260	0.1156	70
lavaan/MLW	48	3.6149	3.2215	0.1260	0.1155	402
semopy/ULS	103	21.0347	13.8440	0.1457	0.1392	67
lavaan/ULS	98	21.0347	13.8440	0.1450	0.1388	560
semopy/GLS	46	4.6510	3.0067	0.1355	0.1260	69
lavaan/GLS	74	4.6510	3.0067	0.1339	0.1240	1204

## Sheet: Comparison w.r.t. scale - Set 9
Pkg/OF	N	Mean OF	Median OF	Mean eps	Median eps	Time (s)
semopy/MLW	76	5.7551	5.4780	0.1405	0.1316	115
lavaan/MLW	112	5.7551	5.4780	0.1408	0.1316	907
semopy/ULS	178	38.3008	28.6667	0.1671	0.1628	104
lavaan/ULS	181	38.3008	28.6667	0.1668	0.1624	1967
semopy/GLS	107	6.1504	4.4635	0.1510	0.1444	94
lavaan/GLS	159	6.1504	4.4635	0.1514	0.1435	4781

[truncated: 6 more sheets: Comparison w.r.t. scale - Set 10, Comparison w.r.t. scale - Set 11, Comparison w.r.t. scale - Set 12, Comparison w.r.t. scale - Set 13, Comparison w.r.t. scale - Set 14, Comparison w.r.t. scale - Set 15]
